# Supplementary material for: Enhanced Intervertebral Disc Repair via Genetically Engineered Mesenchymal Stem Cells with Tetracycline Regulatory System
Source: MDPI journal article supplement (doi:10.3390/ijms242216024), 2023-11-07
Supplement: s1 [file s1]

## Supplementary Materials

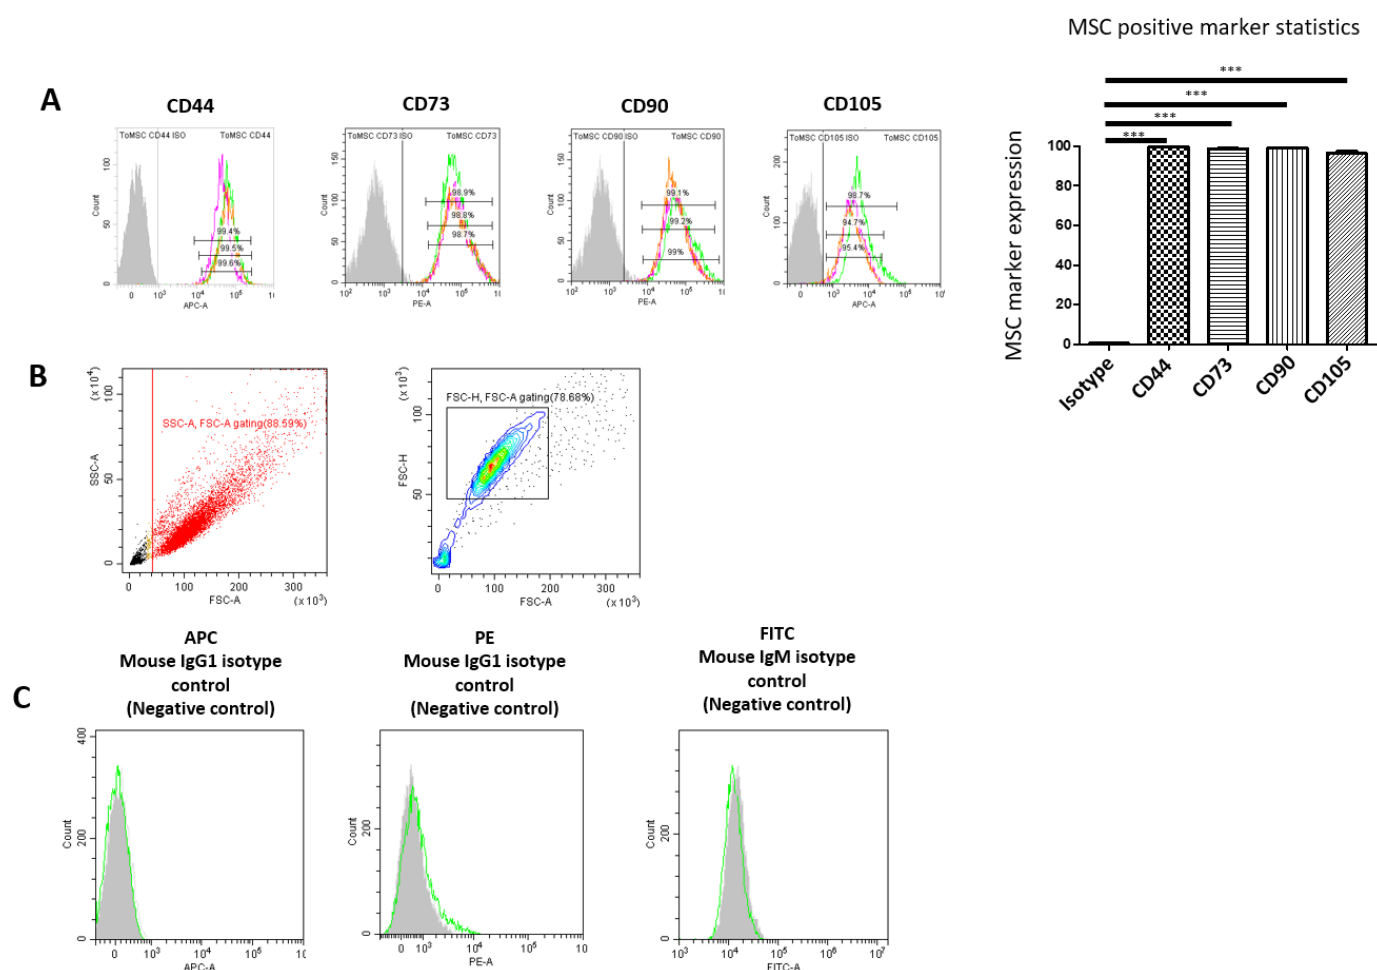

**Figure S1. Flow cytometry statistical processing for ToMSCs and negative controls for antibodies APC, PE, FITC (A)** Flow cytometry statistics MSC marker (CD44, CD73, CD90 and CD105). (B) Flow cytometry analysis gating (SSC-A, FSC-A) and (FSC-H, FSC-A). (C) Flow cytometry analysis of negative control. . \*\*\* $p < 0.001$ , indicating a significant difference between groups as determined by one-way analysis of variance.

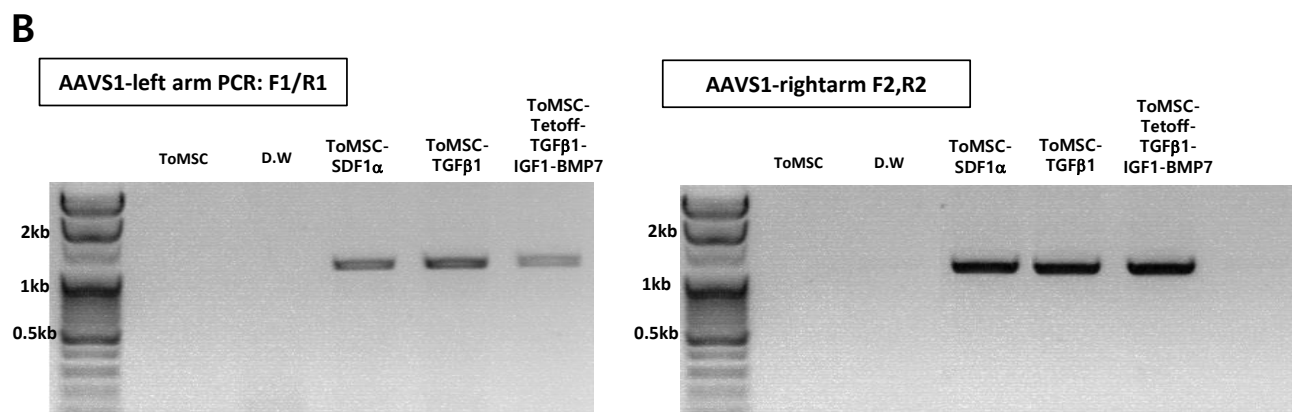

**Figure S2. Uncropped gels image of Figure 2B. CRISPR/Cas9-mediated knock-in of transgenes into a safe-harbor site**

(AAVS1) on the ToMSC chromosome.

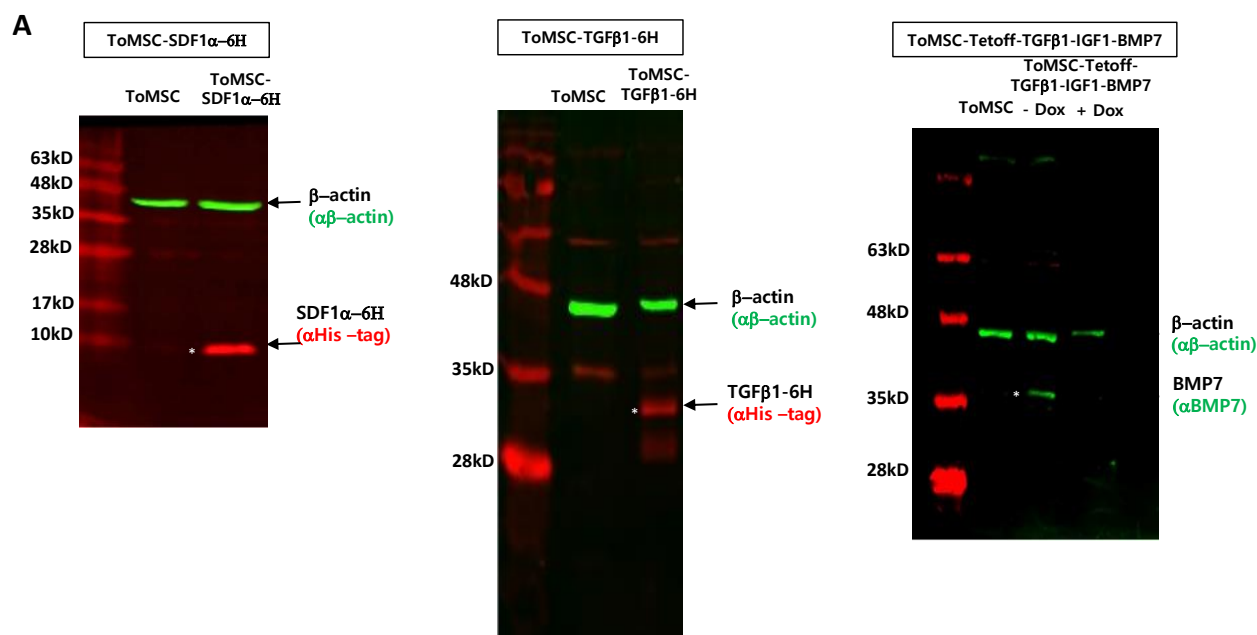

**Figure S3. Uncropped blots image of figure 3A.** Transgenic expression as evaluated by western blots, immunocytochemistry, and qRT-PCR.

| Target              | Primer sequence                                                                     | Size     | Annealing temperature (°C) | PCR cycle |
|---------------------|-------------------------------------------------------------------------------------|----------|----------------------------|-----------|
| AAVS1-left arm PCR  | F1: 5'-CCT GAG TCC GGA CCA CTT TGA GC-3'<br>R1: 5'-GAG GAA GAG TTC TTG CAG CTC G-3' | 1,163 bp | 63                         | 30        |
| AAVS1-right arm PCR | F2: 5'-AAC ATA CGA GCC GGA AGC AT-3'<br>R2: 5'-CGT TGT AAA ACG ACG GCC AG-3'        | 1,062 bp | 63                         | 30        |
| TGFB1               | F: 5'-CCC AGC ATC TGC AAA GCT C-3'<br>R: 5'-GTC AAT GTA CAG CTG CCG CA-3'           | 148 bp   | 52.1                       | 29        |
| IGF1                | F: 5'-TTG CTA AAT CTC ACT GTC ACT GC-3'<br>R: 5'-GCT CCG GAA GCA GCA CT-3'          | 173 bp   | 55.1                       | 32        |
| BMP7                | F: 5'-GGG CTT CTC CTA CCC CTA CA-3'<br>R: 5'-ACG TCT CAT TGT CGA AGC GT-3'          | 163 bp   | 59.1                       | 32        |
| GAPDH               | F: 5'-GGG GTG AAC CAT GAG AAG TAT GA-3'<br>R: 5'-GAG TCC TTC CAC GAT ACC AAA G-3'   | 153 bp   | 55.1                       | 27        |

|             |                                        |                               |
|-------------|----------------------------------------|-------------------------------|
| AAVS1-sgRNA | 5'-CCCCACAGTGGGGCCACTAG <u>GGG</u> -3' | *PAM sequence was underlined. |
|-------------|----------------------------------------|-------------------------------|

**Table S1.** Sequences of PCR primers and sgRNA used in this study
